# Supplementary material for: Sex differences in medico-legal action against doctors: a systematic review and meta-analysis
Source: Springer Nature journal article supplement (doi:10.1186/s12916-015-0413-5), 2015-07-29

**Table S1: Search terms used for electronic database search  
MEDLINE search in January 2015**

| Concept 1                                                                        | Concept 2                                                                                                                   | Concept 3                                                                                                                                                                                                    |
|----------------------------------------------------------------------------------|-----------------------------------------------------------------------------------------------------------------------------|--------------------------------------------------------------------------------------------------------------------------------------------------------------------------------------------------------------|
| MeSH term Physicians<br>Doctor?<br>Medical Practitioner?<br>Medic?<br>Clinician? | MeSH term Gender Identity<br>MeSH term Male<br>MeSH term Female<br>(Male and Female MeSH terms<br>combined with AND)<br>Sex | MeSH term Malpractice<br>MeSH term Employee Performance<br>Appraisal<br>Clinical competen*<br>Disciplinary board<br>Disciplinary action<br>Professional misconduct<br>Fitness to practi*<br>Medical regulat* |

**Embase search conducted in January 2015**

| Concept 1                                                                       | Concept 2                                                                                                                                                                        | Concept 3                                                                                                                                                                                                                                                                                    |
|---------------------------------------------------------------------------------|----------------------------------------------------------------------------------------------------------------------------------------------------------------------------------|----------------------------------------------------------------------------------------------------------------------------------------------------------------------------------------------------------------------------------------------------------------------------------------------|
| MeSH term Physician<br>Doctor?<br>Medical Practitioner?<br>Medic?<br>Clinician? | MeSH term Gender and Sex<br>MeSH term Gender Identity<br>MeSH term Gender<br>MeSH Male<br>MeSH term Female<br>(Male and Female MeSH terms<br>combined with AND)<br>MeSH term Sex | MeSH term Malpractice<br>MeSH term Job Performance<br>MeSH term Performance<br>MeSH term Professional Practice<br>MeSH term Professional Misconduct<br>Clinical competen*<br>Disciplinary board<br>Disciplinary action<br>Fitness to practi*<br>Medical regulat*<br>Professional performance |

**PsycINFO search conducted in January 2015**

| Concept 1                                                                                                       | Concept 2                        | Concept 3                                                                                                                                                                                                                                    |
|-----------------------------------------------------------------------------------------------------------------|----------------------------------|----------------------------------------------------------------------------------------------------------------------------------------------------------------------------------------------------------------------------------------------|
| MeSH term Physicians<br>MeSH term Family Physicians<br>Doctor?<br>Medical Practitioner?<br>Medic?<br>Clinician? | MeSH term Gender Identity<br>Sex | MeSH term Professional Liability<br>MeSH term Professional<br>Competence<br>Clinical competen*<br>Disciplinary board<br>Disciplinary action<br>Professional misconduct<br>Fitness to practi*<br>Medical regulat*<br>Professional performance |

**Table S2: Names of journals and conference abstracts searched electronically**

**Journals that yielded the majority of eligible articles**

BMJ Quality & Safety  
British Medical Journal  
The American Journal of Medicine  
The Journal of the American Medical Association  
The Medical Journal of Australia

**Journals felt to be important in the medical education field**

Academic Medicine  
Medical Education  
Medical Teacher  
The New England Journal of Medicine

**Medical education conference abstracts**

The Association for Medical Education in Europe  
The Association for the Study of Medical Education

---

**Figure S1: Funnel plot of effect size by inverse standard error**

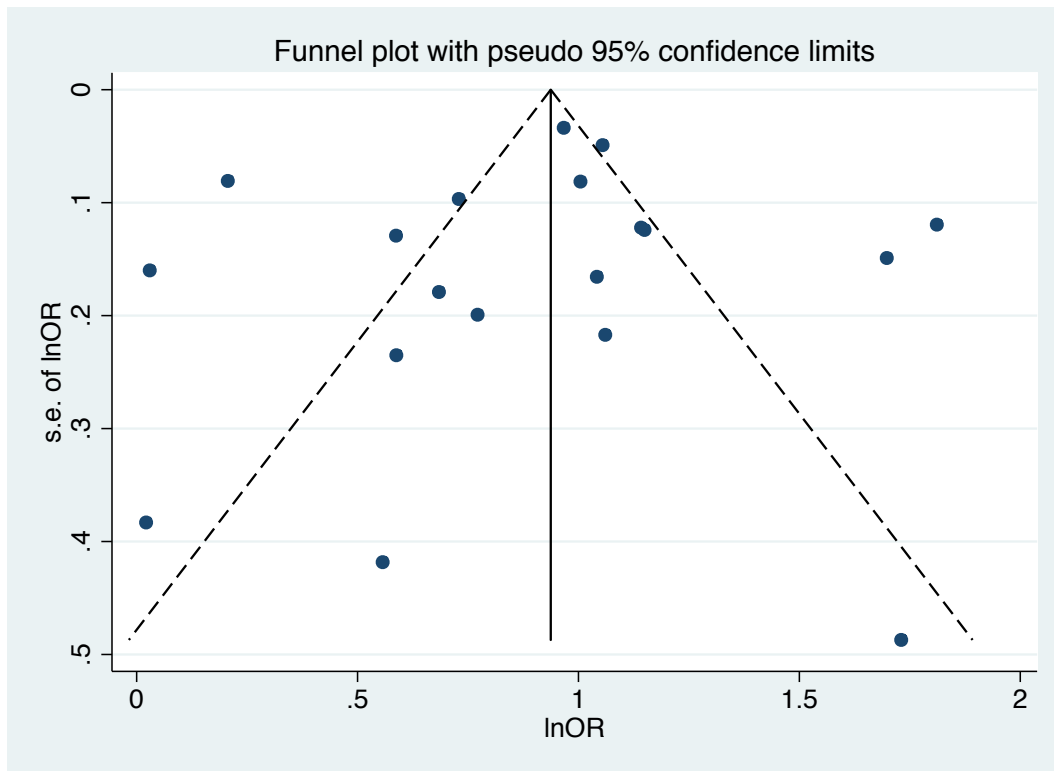

Supplement: MOESM1 [file 9758978]
